# Supplementary material for: A Rapid Method for Performing a Multivariate Optimization of Phage Production Using the RCCD Approach
Source: MDPI journal article supplement (doi:10.3390/pathogens10091100), 2021-08-29
Supplement: s1 [file s1]

## Pathogens

### Supplementary material

**Table S1:** Experimental design used by each experimental unit (LB medium and M9 media supplemented with acetate, pyruvate, lactate, glycerol, succinate and glucose), based on Rotatable Central Composite Design. The variables were: Te = temperature (28 °C ≤ Te ≤ 40 °C); It = incubation time (4 h ≤ It ≤ 12 h); Ag = agitation (100 rpm ≤ Ag ≤ 250 rpm) and MOI = Multiplicity of Infection (0.00001 ≤ MOI ≤ 0.1).

| Assay | Te (°C) | It (h) | Ag (rpm) | MOI     |
|-------|---------|--------|----------|---------|
| 1     | 31      | 6      | 138      | 0.01    |
| 2     | 37      | 6      | 138      | 0.01    |
| 3     | 31      | 10     | 138      | 0.01    |
| 4     | 37      | 10     | 138      | 0.01    |
| 5     | 31      | 6      | 215      | 0.01    |
| 6     | 37      | 6      | 215      | 0.01    |
| 7     | 31      | 10     | 215      | 0.01    |
| 8     | 37      | 10     | 215      | 0.01    |
| 9     | 31      | 6      | 138      | 0.0001  |
| 10    | 37      | 6      | 138      | 0.0001  |
| 11    | 31      | 10     | 138      | 0.0001  |
| 12    | 37      | 10     | 138      | 0.0001  |
| 13    | 31      | 6      | 215      | 0.0001  |
| 14    | 37      | 6      | 215      | 0.0001  |
| 15    | 31      | 10     | 215      | 0.0001  |
| 16    | 37      | 10     | 215      | 0.0001  |
| 17    | 28      | 8      | 175      | 0.001   |
| 18    | 40      | 8      | 175      | 0.001   |
| 19    | 34      | 4      | 175      | 0.001   |
| 20    | 34      | 12     | 175      | 0.001   |
| 21    | 34      | 8      | 100      | 0.001   |
| 22    | 34      | 8      | 250      | 0.001   |
| 23    | 34      | 8      | 175      | 0.10    |
| 24    | 34      | 8      | 175      | 0.00001 |
| 25    | 34      | 8      | 175      | 0.001   |
| 26    | 34      | 8      | 175      | 0.001   |
| 27    | 34      | 8      | 175      | 0.001   |
| 28    | 34      | 8      | 175      | 0.001   |

**Table S2:** Experimental design used by each experimental unit in coded (LB medium and M9 media supplemented with acetate, pyruvate, lactate, glycerol, succinate and glucose), in coded values, based on Rotatable Central Composite Design.

| Assay | Te (°C)    | It (h)     | Ag (rpm)   | MOI        |
|-------|------------|------------|------------|------------|
| 1     | -1         | -1         | -1         | +1         |
| 2     | +1         | -1         | -1         | +1         |
| 3     | -1         | +1         | -1         | +1         |
| 4     | +1         | +1         | -1         | +1         |
| 5     | -1         | -1         | +1         | +1         |
| 6     | +1         | -1         | +1         | +1         |
| 7     | -1         | +1         | +1         | +1         |
| 8     | +1         | +1         | +1         | +1         |
| 9     | -1         | -1         | -1         | -1         |
| 10    | +1         | -1         | -1         | -1         |
| 11    | -1         | +1         | -1         | -1         |
| 12    | +1         | +1         | -1         | -1         |
| 13    | -1         | -1         | +1         | -1         |
| 14    | +1         | -1         | +1         | -1         |
| 15    | -1         | +1         | +1         | -1         |
| 16    | +1         | +1         | +1         | -1         |
| 17    | - $\alpha$ | 0          | 0          | 0          |
| 18    | + $\alpha$ | 0          | 0          | 0          |
| 19    | 0          | - $\alpha$ | 0          | 0          |
| 20    | 0          | + $\alpha$ | 0          | 0          |
| 21    | 0          | 0          | - $\alpha$ | 0          |
| 22    | 0          | 0          | + $\alpha$ | 0          |
| 23    | 0          | 0          | 0          | + $\alpha$ |
| 24    | 0          | 0          | 0          | - $\alpha$ |
| 25    | 0          | 0          | 0          | 0          |
| 26    | 0          | 0          | 0          | 0          |
| 27    | 0          | 0          | 0          | 0          |
| 28    | 0          | 0          | 0          | 0          |

**Table S3:** Amount of phages (PFU/mL) observed in the end of the experiments. The quantification was made using double-agar assay.

| Assay | acetate  | lactate  | pyruvate | glycerol | succinate | glucose  | LB       |
|-------|----------|----------|----------|----------|-----------|----------|----------|
| 1     | 8.67E+08 | 5.64E+09 | 5.53E+09 | 4.66E+09 | 7.67E+08  | 7.86E+09 | 2.57E+09 |
| 2     | 7.44E+07 | 5.28E+09 | 4.71E+09 | 4.90E+09 | 1.70E+09  | 9.56E+09 | 5.42E+09 |
| 3     | 4.23E+08 | 5.73E+09 | 2.76E+09 | 1.89E+10 | 2.80E+09  | 8.29E+10 | 3.46E+10 |

|    |          |          |          |          |          |          |          |
|----|----------|----------|----------|----------|----------|----------|----------|
| 4  | 4.47E+08 | 6.63E+09 | 6.74E+09 | 4.92E+09 | 6.93E+09 | 4.42E+10 | 3.38E+10 |
| 5  | 2.74E+09 | 2.42E+10 | 6.13E+09 | 9.52E+09 | 1.42E+10 | 1.04E+10 | 2.21E+08 |
| 6  | 1.50E+08 | 4.28E+09 | 3.23E+08 | 3.32E+09 | 1.33E+09 | 1.05E+10 | 7.44E+09 |
| 7  | 1.00E+09 | 7.60E+09 | 2.91E+09 | 6.53E+08 | 3.87E+09 | 1.41E+09 | 2.43E+09 |
| 8  | 1.64E+09 | 6.24E+09 | 7.66E+09 | 7.59E+09 | 4.33E+09 | 6.20E+09 | 6.77E+09 |
| 9  | 5.91E+08 | 1.09E+10 | 6.77E+06 | 4.76E+08 | 5.83E+07 | 3.58E+08 | 3.31E+08 |
| 10 | 2.76E+07 | 6.80E+09 | 1.28E+09 | 4.40E+08 | 5.43E+09 | 1.38E+10 | 8.36E+09 |
| 11 | 4.02E+08 | 3.84E+09 | 2.30E+07 | 1.83E+08 | 9.33E+07 | 4.12E+08 | 1.91E+08 |
| 12 | 4.84E+08 | 3.58E+09 | 8.12E+09 | 3.96E+08 | 1.97E+09 | 1.32E+10 | 1.01E+10 |
| 13 | 4.69E+08 | 2.44E+09 | 2.14E+09 | 2.14E+09 | 7.03E+08 | 3.51E+09 | 6.66E+08 |
| 14 | 5.82E+08 | 7.94E+09 | 3.90E+09 | 2.83E+09 | 5.03E+07 | 8.98E+09 | 5.38E+09 |
| 15 | 1.17E+09 | 5.82E+09 | 7.32E+09 | 2.19E+08 | 6.13E+09 | 6.69E+09 | 2.46E+09 |
| 16 | 8.47E+07 | 1.49E+09 | 3.87E+09 | 3.07E+09 | 7.20E+08 | 4.74E+09 | 2.97E+09 |
| 17 | 6.11E+08 | 2.82E+09 | 2.82E+09 | 2.84E+09 | 1.63E+09 | 4.73E+09 | 3.51E+09 |
| 18 | 4.08E+07 | 2.78E+09 | 7.60E+07 | 2.17E+08 | 2.00E+09 | 8.3E+09  | 6.09E+09 |
| 19 | 2.70E+08 | 3.29E+09 | 7.87E+08 | 6.72E+08 | 3.77E+08 | 2.24E+09 | 5.22E+07 |
| 20 | 1.11E+09 | 5.78E+09 | 3.63E+09 | 3.64E+09 | 4.50E+09 | 1.14E+09 | 5.71E+09 |
| 21 | 2.58E+09 | 2.71E+09 | 1.69E+09 | 6.48E+08 | 9.27E+08 | 4.91E+09 | 9.80E+09 |
| 22 | 9.84E+08 | 3.80E+09 | 6.44E+09 | 2.34E+09 | 2.47E+09 | 7.8E+09  | 2.07E+09 |
| 23 | 1.20E+09 | 3.80E+09 | 3.18E+09 | 2.44E+09 | 6.03E+08 | 6.68E+09 | 4.26E+09 |
| 24 | 2.97E+08 | 4.40E+09 | 6.11E+09 | 5.92E+09 | 7.43E+08 | 8.76E+09 | 9.58E+09 |
| 25 | 9.07E+08 | 1.86E+09 | 7.11E+09 | 1.82E+09 | 4.59E+09 | 5.09E+09 | 2.49E+09 |
| 26 | 4.70E+09 | 3.33E+09 | 6.86E+09 | 2.4E+09  | 4.60E+09 | 5.24E+09 | 4.16E+09 |
| 27 | 6.53E+08 | 6.34E+09 | 5.73E+09 | 3.69E+08 | 1.63E+09 | 8.59E+09 | 7.86E+09 |
| 28 | 3.92E+08 | 5.63E+09 | 5.96E+09 | 9.89E+07 | 2.43E+09 | 5.49E+09 | 6.42E+09 |

---
